# Supplementary material for: Identification and mechanistic insights of cell senescence-related genes in psoriasis
Source: PeerJ. 2025 Jan 14;13:e18818. doi: 10.7717/peerj.18818 (PMC11740738; doi:10.7717/peerj.18818)
Supplement: Supplemental Information 1 [file peerj-13-18818-s001.xls]

## Sheet: Sheet1
ITEM TO CHECK	IMPORTANCE	CHECKLIST	page/line
EXPERIMENTAL DESIGN
Definition of experimental and control groups	E	The experimental group consisted of skin samples from psoriasis patients, and the control group consisted of healthy skin samples.	4/121-123
Number within each group	E	5 samples in each group
Assay carried out by core lab or investigator's lab?	D
Acknowledgement of authors' contributions	D
SAMPLE
Description（	E	Frozen tissue samples, each 50 mg.	4/124
Volume/mass of sample processed	D
Microdissection or macrodissection	E	NO
Processing procedure	E
If frozen - how and how quickly?	E	1.50 mg of tissue was taken from each frozen sample. 2.The tissue was homogenized with 1 mL of TRIzol reagent and incubated on ice for 10 minutes to ensure thorough cell lysis. 3.300 µL of chloroform was added, followed by vigorous shaking for 30 seconds, and then the mixture was allowed to stand at room temperature for 10 minutes to allow phase separation. 4.The mixture was centrifuged at 12,000…	4/123-133
If fixed - with what, how quickly?	E	NO
Sample storage conditions and duration (especially for FFPE samples)	E	RNA was either immediately reverse transcribed or stored at -196°C.	4/123-124
NUCLEIC ACID EXTRACTION
Procedure and/or instrumentation	E	1.Sample Homogenization: 50 mg of tissue was homogenized in 1 mL of TRIzol reagent. 2.Phase Separation: After homogenization, 300 µL of chloroform was added, and the mixture was vigorously shaken for 30 seconds. This was followed by a 10-minute incubation at room temperature to allow the mixture to separate into three distinct phases. 3.Centrifugation: The mixture was centrifuged at 12,000g for 1…	4/123-133
Name of kit and details of any modifications	E	TRIzol reagent was used according to the manufacturer's protocol, with no specific modifications mentioned.	4/141-143
Source of additional reagents used	D
Details of DNase or RNAse treatment	E	There was no DNase treatment applied as the focus was on RNA extraction and cDNA synthesis. The RNA was treated with RNase-free water to avoid contamination.	4/132-144
Contamination assessment (DNA or RNA)	E	The purity of RNA was assessed by measuring the A260/A280 ratio, which provides an indication of protein contamination.	4/134-136
Nucleic acid quantification	E	RNA concentration and purity were measured using a NanoDrop spectrophotometer (NanCChotometer N50).	4/142-143
Instrument and method	E	The quantification of RNA was performed using a NanoDrop spectrophotometer, which measures absorbance to determine RNA concentration and purity.	4/142-143
Purity (A260/A280)	D
Yield	D
RNA integrity method/instrument	E	The RNA integrity was assessed using the NanoDrop spectrophotometer by measuring the A260/A280 ratio, which gives an indication of RNA purity. However, no specific RNA integrity number (RIN) or gel electrophoresis data were provided to assess RNA integrity further.	4/134-136
RIN/RQI or Cq of 3' and 5' transcripts	E	NO
Electrophoresis traces	D
Inhibition testing (Cq dilutions, spike or other)	E	The quality of the RNA was primarily assessed through concentration and purity metrics (A260/A280 ratio).	4/134-136
REVERSE TRANSCRIPTION
Complete reaction conditions	E	Use a standard PCR machine to conduct the reverse transcription reaction (converting RNA to cDNA) under these conditions: 25°C for 5 minutes (primer binding step) 50°C for 15 minutes (reverse transcription process) 85°C for 5 seconds (reaction termination) Hold at 4°C (to store the sample).Use a CFX96 real-time PCR machine and run the following cycling conditions: 95°C for 1 minute (initial denat…	4/148-156
Amount of RNA and reaction volume	E	2 µg of total RNA was used in a 20 µL reaction volume for reverse transcription.	4/146-147
Priming oligonucleotide (if using GSP) and concentration	E	1 µL of forward primer (10 µM), 1 µL of reverse primer (10 µM)	4/151-152
Reverse transcriptase and concentration	E	1 µL of SweScript RT I Enzyme Mix was used for reverse transcription.	4/146
Temperature and time	E	Use a standard PCR machine to conduct the reverse transcription reaction (converting RNA to cDNA) under these conditions:	4/148-156
Manufacturer of reagents and catalogue numbers	D
Cqs with and without RT	D*
Storage conditions of cDNA	D
qPCR TARGET INFORMATION		Hold at 4°C (to store the sample).Use a CFX96 real-time PCR machine and run the following cycling conditions:
If multiplex, efficiency and LOD of each assay.	E	Not Applicable.
Sequence accession number	E	CXCL1：NM_001511.4 ID4：NM_001546.4 CCND1：NM_053056.3 RF7：XM_054368689.1	5/164-167
Location of amplicon	D
Amplicon length	E	CXCL1：203bp ID4：110bp CCND1：93bp RF7：182bp	5/164-167
In silico specificity screen (BLAST, etc)	E	Through Primer BLAST, the results showed that the primer only amplified the target gene	5/167-168
Pseudogenes, retropseudogenes or other homologs?	D
Sequence alignment	D
Secondary structure analysis of amplicon	D
Location of each primer by exon or intron (if applicable)	E	Primer is located in the exon
What splice variants are targeted?	E	Not Applicable.
qPCR OLIGONUCLEOTIDES
Primer sequences	E	CXCL1: Forward (F): AGGCAGGGGAATGTATGTGC, Reverse (R): GCCCCTTTGTTCTAAGCCAGA ID4: Forward (F): AGCTCCGAAGGGAGTGACTA, Reverse (R): TCGCTCTGGGTTTTACGAGG CCND1: Forward (F): AGCTGTGCATCTACACCGAC, Reverse (R): GAAATCGTGCGGGGTCATTG IRF7: Forward (F): GCTACAAGCCCTCAGTCCAC, Reverse (R): GACTGGCATCTGGAGAGGGT GAPDH (housekeeping gene): Forward (F): CGAAGGTGGAGTCAACGGATTT, Reverse (R): ATGGGTGGAATCATATTGGA…	5/170-175
RTPrimerDB Identification Number	D
Probe sequences	D**	Not applicable
Location and identity of any modifications	E	No modifications
Manufacturer of oligonucleotides	D
Purification method	D
qPCR PROTOCOL
Complete reaction conditions	E	Thaw the components at room temperature, briefly centrifuge, and place on ice. Prepare the reaction mixture by adding 4 µL of 5x Reaction Buffer, 1 µL of Primer, 1 µL of SweScript RT I Enzyme Mix, 2 µg of Total RNA, and nuclease-free water to a final volume of 20 µL. After mixing and briefly centrifuging, perform reverse transcription on a standard PCR machine under the following conditions: 25°C…	4/144-156
Reaction volume and amount of cDNA/DNA	E	The total reaction volume was 20 µL, containing 3 µL of cDNA (which was previously diluted).	4/149-151
Primer, (probe), Mg++ and dNTP concentrations	E	The primer concentrations were each 10 µM. The dNTP concentrations and Mg++ concentrations are typically included in the Master Mix	4/152
Polymerase identity and concentration	E	The polymerase was included in the Universal Blue SYBR Green qPCR Master Mix	4/151
Buffer/kit identity and manufacturer	E	The buffer was part of the 2xUniversal Blue SYBR Green qPCR Master Mix provided by the manufacturer,reagents provided by Bio-Rad Laboratories, Inc.	4/144
Exact chemical constitution of the buffer	D
Additives (SYBR Green I, DMSO, etc.)	E	The key additive used in the qPCR is SYBR Green I, which is part of the qPCR Master Mix.	4/144
Manufacturer of plates/tubes and catalog number	D
Complete thermocycling parameters	E	95°C for 1 minute (initial denaturation) 95°C for 20 seconds (denaturation for each cycle) 55°C for 20 seconds (annealing step) 72°C for 30 seconds (extension step) Perform a total of 40 cycles.	4/154-156
Reaction setup (manual/robotic)	D
Manufacturer of qPCR instrument	E	The qPCR was performed using the CFX Connect Real-Time PCR Detection System by BIO-RAD.	4/153
qPCR VALIDATION
Evidence of optimisation (from gradients)	D
Specificity (gel, sequence, melt, or digest)	E	Use gel electrophoresis and melting curve analysis	4/156-157
For SYBR Green I, Cq of the NTC	E	25	4/158
Standard curves with slope and y-intercept	E	Y=-3.41X+31.927	4/159
PCR efficiency calculated from slope	E	0.9645	4/160
Confidence interval for PCR efficiency or standard error	D
r2 of standard curve	E	0.9994	4/161
Linear dynamic range	E	90%-110%	4/160
Cq variation at lower limit	E	15-35	4/162
Confidence intervals throughout range	D
Evidence for limit of detection	E	NO
If multiplex, efficiency and LOD of each assay.	E	Not applicable
DATA ANALYSIS
qPCR analysis program (source, version)	E	Bio-Rad CFX Manager, version 3.1	4/136-137
Cq method determination	E	"Automatic threshold determination
Outlier identification and disposition	E	Outliers identified by deviation from mean Cq values and excluded from final analysis
Results of NTCs	E	No amplification detected in NTC
Justification of number and choice of reference genes	E	GAPDH used as a reference gene due to its stable expression across all samples	5/173-174
Description of normalisation method	E	ΔΔCq method used for normalization with GAPDH as the reference gene.	5/175
Number and concordance of biological replicates	D
Number and stage (RT or qPCR) of technical replicates	E	Three technical replicates per sample at the qPCR stage.	5/176
Repeatability (intra-assay variation)	E
Reproducibility (inter-assay variation, %CV)	D
Power analysis	D
Statistical methods for result significance	E	Statistical significance determined using GraphPad Prism 5	5/177
Software (source, version)	E	EXCEL2019 Graphd prism8	5/177
Cq or raw data submission using RDML	D
Table 1. MIQE checklist for authors, reviewers and editors. All essential information (E) must be submitted with the manuscript. DesirableTable 1. MIQE checklist for authors, reviewers and editors. All essential information (E) must be submitted with the manuscript.
information (D) should be submitted if available. If using primers obtained from RTPrimerDB, information on qPCR target, oligonucleotides,
protocols and validation is available from that source.
*: Assessing the absence of DNA using a no RT assay is essential when first extracting RNA. Once the sample has been validated as RDNA-free, inclusion of a no-RT control is desirable, but no longer essential.
**: Disclosure of the probe sequence is highly desirable and strongly encouraged. However, since not all commercial pre-designed assay vendors provide this information, it cannot be an essential requirement. Use of such assays is advised against.
