# Supplementary material for: Identification and mechanistic insights of cell senescence-related genes in psoriasis
Source: PeerJ. 2025 Jan 14;13:e18818. doi: 10.7717/peerj.18818 (PMC11740738; doi:10.7717/peerj.18818)
Supplement: Supplemental Information 4 [file peerj-13-18818-s004.xlsx]

## Sheet: date
Sample	CXCL1			ID4			CCND1			IRF7				H-GAPDH				Reference Gene Average Value
Control 1	27.0685	26.8745	26.7726	26.6285	26.8423	26.6356	30.5814	30.6794	31.9653	27.6765	27.4126	27.5125		21.0044	21.0107	21.6773		21.2308
Control 2	30.504	30.539	30.5198	29.8103	30.1435	29.8417	28.7525	29.0256	29.3334	29.8825	30.2857	29.2326		22.8069	22.0405	22.1149		22.3208
Control 3	28.4573	29.1058	29.4909	24.6127	24.6506	24.563	22.5293	22.7869	22.7625	27.4339	27.5687	27.6188		20.4772	20.6142	20.4248		20.5054
Control 4	29.4386	29.0051	29.2783	26.8636	26.7283	27.2956	24.4765	24.4895	24.4208	28.9991	28.9562	28.5012		22.3644	22.2558	22.4921		22.3708
Control 5	29.3678	29.4544	28.6499	27.3997	27.492	27.4339	26.1058	26.7541	26.0995	29.2552	29.1972	29.64		22.5153	22.4555	22.1857		22.3855
psoriasis1	29.2161	29.5766	29.6187	28.7005	29.0881	29.0169	29.0546	28.5838	28.4582	26.3221	25.7911	25.6517		20.2326	20.1193	20.3561		20.236
psoriasis2	26.4564	26.4983	26.2365	27.9055	27.7021	27.6778	25.0695	24.9694	24.7917	24.5812	24.8734	24.0036		19.4145	19.56	19.4515		19.4753
psoriasis3	26.4619	26.3971	26.5114	26.7655	26.9068	26.9472	27.3983	27.1284	27.4535	26.0894	26.2781	25.7385		21.7241	21.5223	21.4768		21.5744
psoriasis4	25.7216	24.2607	23.8388	24.8695	25.151	25.0743	25.2571	25.325	25.3894	24.8208	24.738	24.965		18.7314	18.8251	18.8997		18.8188
psoriasis5	24.7872	25.4492	25.6155	26.2125	25.7803	26.0512	26.7139	26.6645	26.9092	26.5204	26.39	27.0148		20.9982	20.1314	20.2604		20.4633
	∆CT = CT target gene - CT mean value of the reference gene
Control 1							9.35057	9.44861	10.7345	6.44574	6.18182	6.28168
Control 2	8.18318	8.2182	8.19908	7.48952	7.82269	7.52091				7.5617	7.96491	6.91185
Control 3	7.95186	8.60042	8.98554	4.10724	4.14521	4.05762	2.02386	2.2815	2.25705	6.92844	7.06329	7.11339
Control 4	7.06778	6.6343	6.9075	4.49277	4.35752	4.92477	2.10569	2.11866	2.04998	6.62829	6.58545	6.13045
Control 5	6.98227	7.06886	6.26441	5.01421	5.10648	5.04843	3.72029	4.36865	3.71405	6.86969	6.81168	7.25454
psoriasis1	8.98012	9.34056	9.3827	8.46447	8.85215	8.7809	8.81865	8.34783	8.22221	6.08609	5.55512	5.41572
psoriasis2	6.98106	7.02295	6.7612	8.4302	8.22675	8.20243	5.5942	5.49405	5.31641	5.10589	5.39811	4.52829
psoriasis3	4.88751	4.82273	4.93702	5.19113	5.33243	5.37283	5.82397	5.55399	5.8791	4.51502	4.70369	4.16412
psoriasis4	6.90282	5.44197	5.02009	6.0507	6.33228	6.2555	6.43834	6.50625	6.57063	6.00206	5.91927	6.14621
psoriasis5	4.32394	4.98588	5.15216	5.74916	5.31705	5.58787	6.25064	6.20116	6.44594	6.05711	5.9267	6.55155
	Mean ∆CT of the control group
Control 1							4.51445	4.51445	4.51445	6.84886	6.84886	6.84886
Control 2	7.58862	7.58862	7.58862	5.34062	5.34062	5.34062				6.84886	6.84886	6.84886
Control 3	7.58862	7.58862	7.58862	5.34062	5.34062	5.34062	4.51445	4.51445	4.51445	6.84886	6.84886	6.84886
Control 4	7.58862	7.58862	7.58862	5.34062	5.34062	5.34062	4.51445	4.51445	4.51445	6.84886	6.84886	6.84886
Control 5	7.58862	7.58862	7.58862	5.34062	5.34062	5.34062	4.51445	4.51445	4.51445	6.84886	6.84886	6.84886
Control 1							4.51445	4.51445	4.51445	6.84886	6.84886	6.84886
Control 2	7.58862	7.58862	7.58862	5.34062	5.34062	5.34062				6.84886	6.84886	6.84886
Control 3	7.58862	7.58862	7.58862	5.34062	5.34062	5.34062	4.51445	4.51445	4.51445	6.84886	6.84886	6.84886
Control 4	7.58862	7.58862	7.58862	5.34062	5.34062	5.34062	4.51445	4.51445	4.51445	6.84886	6.84886	6.84886
Control 5	7.58862	7.58862	7.58862	5.34062	5.34062	5.34062	4.51445	4.51445	4.51445	6.84886	6.84886	6.84886
	∆∆CT = ∆CT experimental group - mean ∆CT of the control group
Control 1							4.83612	4.93416	6.22005	-0.403124	-0.667042	-0.567176
Control 2	0.594565	0.62958	0.610462	2.14891	2.48207	2.1803				0.71284	1.11605	0.0629865
Control 3	0.363244	1.01181	1.39692	-1.23338	-1.1954	-1.28299	-2.49059	-2.23295	-2.2574	0.0795797	0.214432	0.264528
Control 4	-0.52084	-0.954312	-0.68112	-0.847847	-0.983093	-0.415844	-2.40876	-2.39579	-2.46447	-0.220574	-0.263407	-0.718414
Control 5	-0.606348	-0.519752	-1.3242	-0.326403	-0.234132	-0.29219	-0.794161	-0.145804	-0.800401	0.0208268	-0.0371788	0.405676
psoriasis1	8.98012	9.34056	9.3827	8.46447	8.85215	8.7809	4.3042	3.83338	3.70776	-0.762769	-1.29374	-1.43314
psoriasis2	-0.607557	-0.565669	-0.827412	3.08959	2.88613	2.86181	5.5942	5.49405	5.31641	-1.74297	-1.45075	-2.32057
psoriasis3	-2.70111	-2.76589	-2.6516	-0.149484	-0.00818739	0.03221	1.30952	1.03954	1.36465	-2.33384	-2.14517	-2.68474
psoriasis4	-0.6858	-2.14665	-2.56852	0.710084	0.991668	0.914881	1.92389	1.9918	2.05618	-0.846797	-0.92959	-0.702648
psoriasis5	-3.26468	-2.60273	-2.43646	0.408544	-0.0235685	0.247251	1.73619	1.68671	1.93149	-0.79175	-0.92216	-0.297313
	2^-∆∆CT
Control 1							0.0350092	0.0327092	0.0134146	1.32237	1.58781	1.48162
Control 2	0.662244	0.646365	0.654987	0.225484	0.178987	0.22063				0.610118	0.461356	0.95728
Control 3	0.777414	0.495925	0.379739	2.35116	2.29009	2.43343	5.62009	4.70095	4.78128	0.946333	0.861886	0.832471
Control 4	1.43479	1.93766	1.60338	1.79981	1.9767	1.33408	5.31017	5.26267	5.51923	1.1652	1.20031	1.64537
Control 5	1.5224	1.43371	2.50394	1.25388	1.1762	1.2245	1.73407	1.10635	1.74158	0.985668	1.02611	0.754882
psoriasis1	0.00198022	0.00154245	0.00149805	0.00283101	0.0021639	0.00227346	0.0506181	0.0701517	0.0765335	1.69674	2.45162	2.70034
psoriasis2	1.52368	1.48007	1.7745	0.117474	0.135266	0.137565	0.0207003	0.0221884	0.0250958	3.34723	2.73351	4.99529
psoriasis3	6.503	6.80165	6.28363	1.10917	1.00569	0.977921	0.403456	0.486484	0.388328	5.04144	4.42345	6.42963
psoriasis4	1.60859	4.42798	5.93201	0.611284	0.502896	0.530388	0.263543	0.251425	0.240452	1.7985	1.90473	1.62749
psoriasis5	9.61096	6.07436	5.41312	0.753383	1.01647	0.8425	0.30016	0.310635	0.262158	1.73117	1.89495	1.22885
	2^-∆∆CT Avg
	CXCL1			ID4			CCND1			IRF7
	Control	psoriasis		Control	psoriasis		Control	psoriasis		Control	psoriasis
1					0.00176578		0.0090506	0.0220097		1.38641	2.162
2	0.558929	1.36011		0.151862	0.0948207			0.00758385		0.640439	3.49649
3	0.470542	5.57572		1.71872	0.751362		1.6847	0.142594		0.833615	5.0176
4	1.41635	3.40681		1.24157	0.399532		1.79511	0.0842691		1.26616	1.68281
5	1.55418	6.00558		0.887845	0.634646		0.511134	0.0973803		0.87338	1.53262
Avg	1	4.08705		1	0.376425		1	0.0707674		1	2.7783
SD	0.564308	2.14444		0.660009	0.326902		0.879771	0.0557205		0.313509	1.47155
	±	±		±	±		±	±		±	±
	1±0.5643	4.0871±2.1444		1±0.6600	0.3764±0.3269		1±0.8798	0.0708±0.0557		1±0.3135	2.7783±1.4716
		Control	psoriasis	p value
	CXCL1	1±0.5643	4.0871±2.1444	0.0318
	ID4	1±0.6600	0.3764±0.3269	0.1041
	CCND1	1±0.8798	0.0708±0.0557	0.0476
	IRF7	1±0.3135	2.7783±1.4716	0.0296
